# Supplementary material
Source: PubMed Central journal article supplement (PMC7054335)
Supplement: 41422_2020_283_MOESM3_ESM.pdf [file 41422_2020_283_MOESM3_ESM.pdf]

**Figure S3. Immunostaining of cultured tissues in different culture systems.**

Related to Fig. 1.

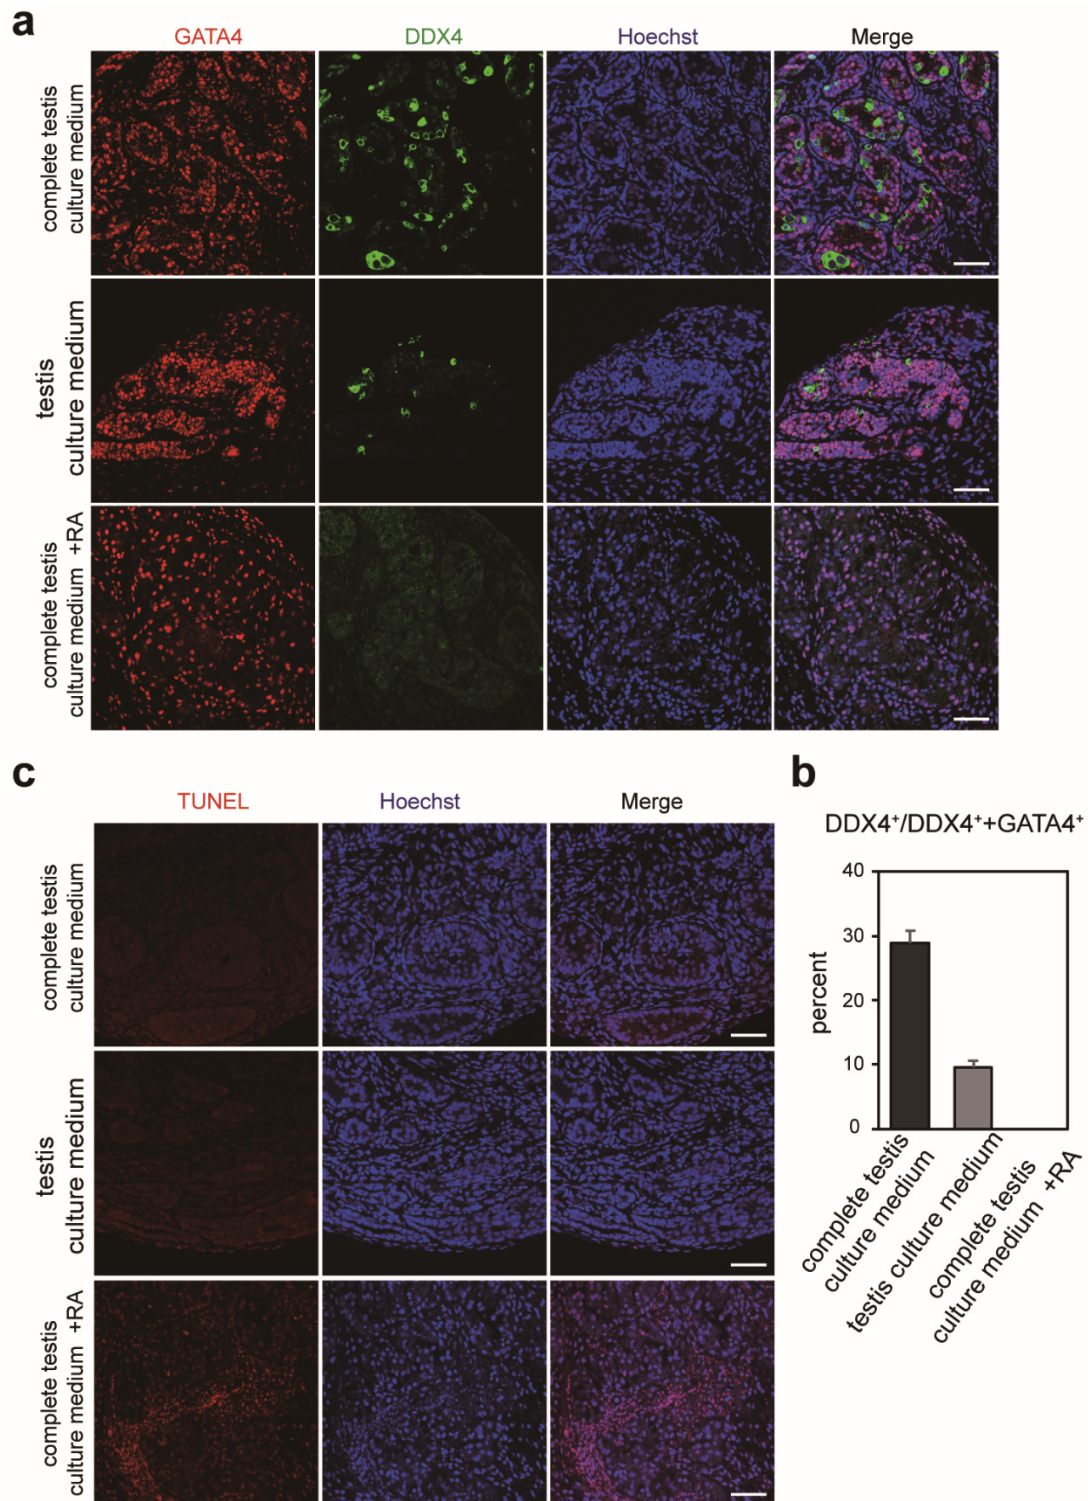

**a,** Immunostaining of tissues cultured for 30 days in 3 different culture media (complete testis culture medium [with cytokines and hormones]; complete testis culture medium with RA; testis culture medium [no cytokines or hormones]). GATA4 (red) and DDX4 (green) at day 30. DNA was counterstained with Hoechst 33342. Scale bars, 100  $\mu$ m.

**b,** Proportion of DDX4-positive cells in the lumen of tissues cultured for 30 days in the 3 different culture media.

**c,** TUNEL staining (red) of tissues cultured for 30 days in 3 different culture media. DNA was counterstained with Hoechst 33342. Scale bars, 100  $\mu$ m.
