# Supplementary material
Source: PubMed Central journal article supplement (PMC7054335)
Supplement: 41422_2020_283_MOESM4_ESM.pdf [file 41422_2020_283_MOESM4_ESM.pdf]

**Figure S4. Immunostaining and TEM of Sertoli cells and Leydig cells in cultured tissues. Related to Fig. 2.**

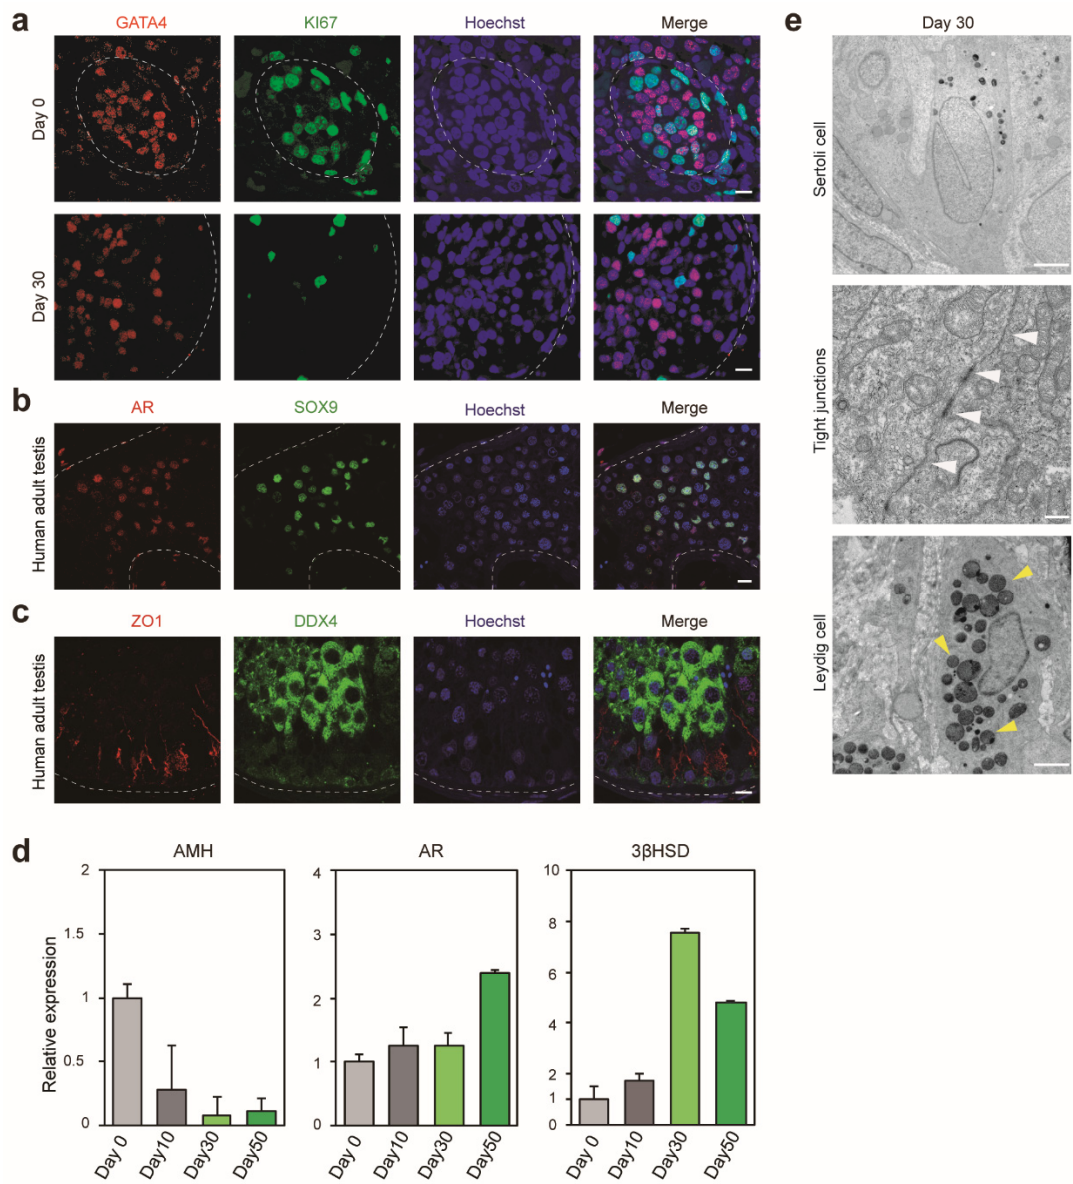

**a**, Immunostaining of Sertoli cells from day 0 and day 30 cultures for GATA4 (red) and Ki67 (green). DNA was counterstained with Hoechst 33342. Scale bars, 10  $\mu\text{m}$ .

**b**, Immunostaining of Sertoli cells in human testis control for AR (red ) and SOX9 (green ). DNA was counterstained with Hoechst 33342. Scale bars, 10  $\mu\text{m}$ .

**c**, Immunostaining of DDX4 (green) and ZO1 (red) in the control human testis. DNA was counterstained with Hoechst 33342. Scale bars, 10  $\mu\text{m}$ .

**d**, qRT-PCR analysis of cultured tissues from day 0 to day 50. Relative gene expression levels were normalized to GAPDH and reflect mean  $\pm$  SD from three independent biological replicates.

**e**, TEM of tissues cultured for 30 days. Tight junction between Sertoli cells (white triangles) and lipid droplets in the Leydig cells (yellow triangles).Scale bars, Sertoli cell:2  $\mu\text{m}$ , Tight junctions:500 nm, Leydig cell:2  $\mu\text{m}$ .
