# Supplementary material
Source: PubMed Central journal article supplement (PMC7054335)
Supplement: 41422_2020_283_MOESM6_ESM.pdf [file 41422_2020_283_MOESM6_ESM.pdf]

**Figure S6. Short tandem repeat (STR) loci of the embryo resulting from ROSI with in vitro-derived spermatids. Related to Fig. 5.**

**a**

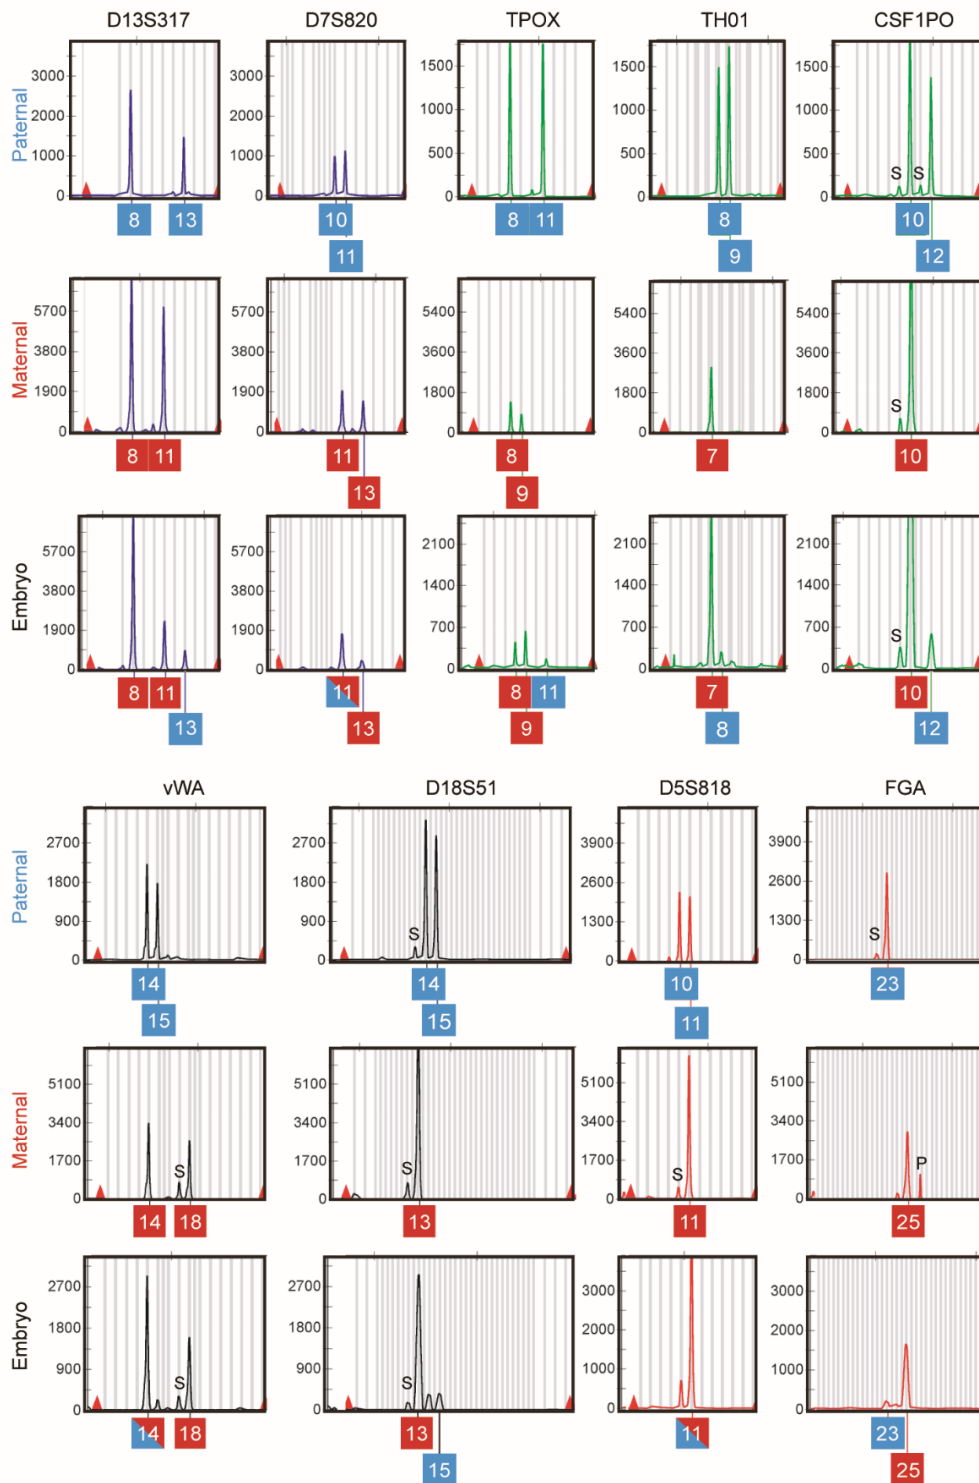

**a**, Skin cells (paternal) from fetus from which fetal ridges were harvested for spermatid derivation, and granulosa cells (maternal) from the oocyte donor, S: Stutter peak; P: Pull down peak.
