# Supplementary material
Source: PubMed Central journal article supplement (PMC7054335)
Supplement: 41422_2020_283_MOESM7_ESM.pdf [file 41422_2020_283_MOESM7_ESM.pdf]

**Table S1. FACS analysis of haploid cells (1C) in tissues at different time points of culture. Related to Fig. 3**

| <b>FACS Experiment No.</b> | <b>Week</b> | <b>Incubation Time</b> | <b>Haploid Cells (%)</b> |
|----------------------------|-------------|------------------------|--------------------------|
| 1                          | Week 19     | Day 10                 | 0.069%                   |
| 2                          | Week 19     | Day 20                 | 0.875%                   |
| 3                          | Week 14     | Day 30                 | 4.08%                    |
| 4                          | Week 14     | Day 40                 | 4.49%                    |
| 5                          | Week 19     | Day 50                 | 9.83%                    |
| 6                          | Week 12     | Day 60                 | 10.1%                    |
| 7                          | Week 19     | Day 134                | 9.44%                    |
