# Supplementary material
Source: PubMed Central journal article supplement (PMC7054335)
Supplement: 41422_2020_283_MOESM8_ESM.pdf [file 41422_2020_283_MOESM8_ESM.pdf]

**Table S2. Percentages of haploid cells (1C) in cultured tissues used for additional analyses. Related to Fig. 3-5 and Table 1**

| <b>FACS Experiment No.</b> | <b>Week</b> | <b>Incubation Time</b> | <b>Haploid Cells (%)</b> |
|----------------------------|-------------|------------------------|--------------------------|
| 1                          | Week 12     | Day 60                 | 10.1%                    |
| 2                          | Week 13     | Day 50                 | 3.07%                    |
| 3                          | Week 16     | Day 54                 | 9.9%                     |
| 4                          | Week 12     | Day 56                 | 5.51%                    |
| 5                          | Week 13     | Day 55                 | 3.28%                    |
| 6                          | Week 12     | Day 60                 | 3.08%                    |
| 7                          | Week 12     | Day 60                 | 7.37%                    |
| 8                          | Week 12     | Day 52                 | 11.1%                    |
| 9                          | Week 12     | Day 53                 | 6.99%                    |
| 10                         | Week 19     | Day 50                 | 9.83%                    |
| 11                         | Week 12     | Day 55                 | 9.44%                    |
| Mean $\pm$ SEM             |             |                        | 7.24%                    |
