# Supplementary material
Source: PubMed Central journal article supplement (PMC7054335)
Supplement: 41422_2020_283_MOESM9_ESM.pdf [file 41422_2020_283_MOESM9_ESM.pdf]

**Table S3. Primer sequences used in this study. Related to Fig. 4 and Fig. S4.**

| Q-PCR                          | Forward                | Reverse                      |
|--------------------------------|------------------------|------------------------------|
| <i>AMH</i>                     | TCCCGAGACACCCGCTACCT   | CCGAACAGCAGTGCCTGCAG         |
| <i>AR</i>                      | GGTGAGCAGAGTGCCCTATC   | GCAGTCTCCAAACGCATGTC         |
| <i>3<math>\beta</math>-HSD</i> | ACACGGTTCCTGGTCTACAC   | CACTGCTTCGTATGGGGTG          |
| <i>GAPDH</i>                   | CGCTTCGCTCTCTGCTCCTCCT | GGTGACCAGGCGCCCAATACGA       |
| Bisulfite                      |                        |                              |
| <i>SNRPN</i>                   | AGGGAGTTGGGATTTTGTATTG | CTCCCCAAACTATCTCTTAAAAAAAACC |
| <i>H19</i>                     | GAGTTYGGGGTTTTGTATAGT  | TAAATAATACCCRACCTAAAAATCTAA  |
