# Supplementary material
Source: PubMed Central journal article supplement (PMC7054335)
Supplement: 41422_2020_283_MOESM10_ESM.pdf [file 41422_2020_283_MOESM10_ESM.pdf]

**Table S4 Antibodies used in this study**

| <b>Antibody</b>           | <b>Supplier</b>           | <b>Catalogue</b> |
|---------------------------|---------------------------|------------------|
| Rabbit anti-DDX4          | Abcam                     | Ab13840          |
| Mouse anti-DDX4           | Abcam                     | Ab27591          |
| Rabbit anti-BLIMP1        | Cell Signaling TECHNOLOGY | #9115            |
| Mouse anti-OCT-4          | SantaCruz                 | SC-5279          |
| Mouse anti-PLZF           | SantaCruz                 | SC-28319         |
| Rabbit anti-PLZF          | SantaCruz                 | SC-22839         |
| Goat anti-AMH             | SantaCruz                 | SC-6886          |
| Mouse anti-3 $\beta$ -HSD | SantaCruz                 | SC-100466        |
| Rabbit anti-KI67          | Abcam                     | Ab16667          |
| Rabbit anti-SYCP3         | Abcam                     | Ab15093          |
| Mouse anti- $\gamma$ H2AX | Abcam                     | Ab26350          |
| Mouse anti-MLH1           | BD                        | 550838           |
| Rabbit anti-SYCP1         | Novus Biologicals         | NB300-229        |
| Rabbit anti-PRM1          | Atlas antibodies          | HPA055150        |
| Rabbit anti-ACROSIN       | LSBIO                     | LS-B10478        |
| Rabbit anti-TFAP2C        | SantaCruz                 | SC-8977          |
| Mouse anti-GATA4          | SantaCruz                 | SC-25310         |
| Mouse anti-CYP17A1        | SantaCruz                 | SC-51244         |
| Mouse anti-AR             | SantaCruz                 | SC-7305          |
| Rabbit anti-ZO1           | Thermo                    | 617300           |
| Rabbit anti-SOX9          | Millipore                 | AB5535           |
| Rabbit anti-Lin 28a       | Abcam                     | Ab46020          |
| Peanut agglutinin         | VECTOR                    | RL-1072          |
